# Supplementary material for: Antimicrobial mechanisms and secondary metabolite profiles of Streptomyces hygroscopicus subsp. hygroscopicus 5–4 against banana fusarium wilt disease using metabolomics
Source: Front Microbiol. 2023 Jun 9;14:1159534. doi: 10.3389/fmicb.2023.1159534 (PMC10289025; doi:10.3389/fmicb.2023.1159534)
Supplement: Supplementary file 3 [file Table_2.xlsx]

## Sheet: Table S2
Table S2 The differentially accumulated metabolites (DAMs) of strain 5-4 in 7dpi vs. 2dpi.
ID	Metabolite	Significant	Regulate	KEGG Compound ID	Mode	CAS ID	M/Z	Retention time	Formula	Library ID	KEGG Pathway Second Category	HMDB Subclass	VIP_pred_OPLS-DA	VIP_PLS-DA	FC(D7/D2)	P_value	FDR	7dpi-1	7dpi-2	7dpi-3	2dpi-1	2dpi-2	2dpi-3
pos_210	2-Hydroxy-4-(4-methoxyphenyl)-1H-phenalen-1-one	yes	up	-	pos	159853-36-8	303.099	4.18627	C20H14O3	HMDB0041462	-	Phenylnaphthalenes	1.9014	1.9004	1.9759	5.32e-05	0.0002895	5.8088	5.8211	5.8204	3.2397	2.7024	2.8886
pos_949	Cis-1,3,4,6,7,11b-Hexahydro-9-methoxy-2H-benzo[a]quinolizine-3-carboxylic acid	yes	up	C15462	pos	-	262.142	5.50707	C15H19NO3	-	-	-	2.4975	2.4958	18.9338	1.61e-07	1.28e-05	5.1371	5.1427	5.3287	0.2792	0.2669	0.2784
pos_3061	16-Acetylpriverogenin A	yes	down	-	pos	26339-85-5	553.331	2.8933	C32H50O5	HMDB0034529	-	Triterpenoids	1.8589	1.858	0.5275	3.7e-05	0.0002329	2.979	2.889	3.3285	5.762	5.8028	5.8639
pos_3125	Ganoderenic acid D	yes	down	-	pos	100665-43-8	554.315	3.0686	C30H40O7	HMDB0036059	-	Triterpenoids	1.7646	1.7649	0.5476	0.003261	0.0058	2.7168	2.7214	3.9498	5.7399	5.668	5.735
pos_3549	5-Methylcytidine	yes	up	-	pos	2140-61-6	258.111	4.41772	C10H15N3O5	HMDB0000982	-	-	1.9623	1.9613	2.1107	0.0001164	0.0004809	5.7775	5.8283	5.8903	3.1679	2.5483	2.5729
pos_3835	Ganoderiol B	yes	up	-	pos	106518-62-1	484.347	5.43028	C30H46O4	HMDB0035327	-	Triterpenoids	1.8769	1.8769	2.1556	0.003949	0.006769	5.2806	5.4163	5.7228	3.4844	2.1114	2.0202
pos_3895	Pubescenol	yes	up	-	pos	90685-93-1	990.629	5.71998	C28H42O6	LMPR0104300001;HMDB0030085	-	Steroid lactones	2.1565	2.1551	2.3971	2.13e-09	2.46e-06	6.2942	6.3286	6.2838	2.6382	2.6121	2.6366
pos_4773	FAHFA(16:0/12-O-18:0)	yes	down	-	pos	1997286-65-3	561.484	9.99563	C34H66O4	LMFA07011040;HMDB0112113	-	Fatty acids and conjugates	1.7994	1.7996	0.5406	0.0003595	0.001056	2.7118	2.9925	3.4775	5.6731	5.7625	5.5511
pos_5705	JWH 073 2-hydroxyindole metabolite-d7	yes	down	-	pos	-	351.212	5.00247	C23H14D7NO2	-	-	-	1.9224	1.9216	0.4847	4.53e-05	0.0002621	2.764	3.0179	2.5081	5.6051	5.7419	5.7521
pos_6028	Tetrahydrofolic acid	yes	up	C00101	pos	135-16-0	468.162	4.18627	C19H23N7O6	HMDB0001846	Global and overview maps;Global and overview maps;Metabolism of cofactors and vitamins;Global and overview maps;Energy metabolism;Amino acid metabolism;Energy metabolism;Translation;Drug resistance: Antineoplastic;Metabolism of cofactors and vitamins	Pterins and derivatives	1.8402	1.839	1.875	6.85e-06	8.48e-05	5.7334	5.7549	5.7462	3.205	2.9037	3.0844
pos_6322	6-[4-(4-carboxybutyl)-2-methoxyphenoxy]-3,4,5-trihydroxyoxane-2-carboxylic acid	yes	up	-	pos	-	383.134	3.49868	C18H24O10	HMDB0127790	-	-	1.8959	1.8955	2.346	0.0006623	0.00167	5.3161	5.3988	4.4602	2.2373	2.1024	2.1269
pos_6726	Pyridinoline	yes	up	-	pos	63800-01-1	920.39	2.81568	C18H28N4O8	HMDB0000851	-	Amino acids, peptides, and analogues	2.4556	2.4541	2.876	1.11e-07	1.06e-05	7.3542	7.3655	7.1953	2.5495	2.5234	2.548
pos_6979	Isoleucyl-Arginine	yes	up	-	pos	-	613.351	2.46145	C12H25N5O3	HMDB0028901	-	Amino acids, peptides, and analogues	2.1148	2.1127	2.6821	0.001359	0.002934	5.8625	5.7609	5.7901	1.7199	1.6943	3.0784
pos_7022	Lacto-N-biose I	yes	down	C06372	pos	50787-09-2	366.143	2.41593	C14H25NO11	HMDB0006575	-	Carbohydrates and carbohydrate conjugates	1.7088	1.7104	0.5514	0.001114	0.002498	2.6844	3.4392	2.6368	5.5029	5.1091	5.2759
pos_8900	Choline	yes	down	C00114	pos	62-49-7	104.107	0.619367	C5H13NO	HMDB0000097	Global and overview maps;Lipid metabolism;Membrane transport;Digestive system;Amino acid metabolism;Nervous system;Cancers: Overview	Quaternary ammonium salts	2.0964	2.0942	0.5157	8.56e-06	9.63e-05	3.9358	3.6254	3.5404	7.1857	7.1617	7.1845
pos_9079	4-Phenyl-2-butanol	yes	up	-	pos	2344-70-9	339.174	0.5165	C10H14O	HMDB0031613	-	-	1.9475	1.9467	2.2224	1.38e-05	0.0001296	5.5836	5.5612	5.2504	2.5524	2.4187	2.4049
neg_1478	Hygromycin B	yes	up	C01925	neg	31282-04-9	526.226	0.482033	C20H37N3O13	HMDB0034229	Global and overview maps	Carbohydrates and carbohydrate conjugates	1.8009	1.801	1.8958	1.17e-05	0.0001134	5.3335	5.2856	5.0367	2.7669	2.7403	2.7528
neg_2460	Bis-N-butyl phthalate	yes	up	-	neg	159733-93-4	512.178	1.54323	C22H29NO10	HMDB0031949	-	Carbohydrates and carbohydrate conjugates	2.1191	2.1189	2.308	1.52e-06	3.3e-05	6.0581	6.1115	5.8612	2.6175	2.5909	2.6034
neg_2770	Gluten exorphin B4	yes	up	-	neg	-	510.162	1.89072	C24H27N5O9	HMDB0059794	-	Amino acids, peptides, and analogues	1.9994	1.9999	2.4152	8.33e-05	0.0003971	5.4406	5.3546	4.8403	2.1712	2.1448	2.1572
neg_3089	Torvoside G	yes	up	-	neg	184777-22-8	643.368	2.29915	C34H56O9	HMDB0030337	-	Steroidal glycosides	1.9362	1.9358	2.1323	8.81e-08	6.17e-06	5.3582	5.2943	5.3985	2.5229	2.4963	2.5089
neg_3255	Betavulgaroside VIII	yes	up	-	neg	178535-52-9	939.421	2.5246	C46H68O20	HMDB0034816	-	Terpene glycosides	2.1786	2.1786	2.5933	4.37e-06	6.06e-05	5.9229	5.9145	5.7598	2.1784	2.4445	2.1644
neg_3451	Hemorphin-4	yes	down	-	neg	-	610.253	2.8232	C29H35N5O7	HMDB0059788	-	Amino acids, peptides, and analogues	1.7398	1.7409	0.5453	0.003018	0.00533	2.606	2.427	3.6178	5.3451	5.184	5.3385
neg_4077	Vignatic acid B	yes	up	-	neg	181485-20-1	556.242	4.03678	C27H41N3O7	HMDB0033617	-	Amino acids, peptides, and analogues	1.9169	1.916	2.5275	0.002009	0.003804	4.4283	4.4706	5.4327	1.4384	2.2222	2.0103
neg_4200	Benzoyl ecgonine	yes	up	-	neg	519-09-5	270.114	4.3336	C16H19NO4	HMDB0041836	-	Benzoic acids and derivatives	1.956	1.9554	3.0342	0.001044	0.00229	4.3374	4.4938	4.4847	2.1541	1.1242	1.1092
neg_4241	Erythratine	yes	up	-	neg	5550-20-9	360.146	4.455	C18H21NO4	HMDB0030181	-	Erythrinanes	1.7619	1.7628	2.0321	0.002118	0.003968	5.0896	5.2345	4.1305	2.3841	2.3576	2.3701
neg_4281	Sarmentosin	yes	up	C08340	neg	71933-54-5	320.096	4.59053	C11H17NO7	HMDB0030697	-	Fatty acyl glycosides	2.4294	2.4291	6.7921	4.12e-05	0.0002665	5.3295	5.5495	4.9363	0.6408	0.6204	1.0673
neg_4669	(Z)-8-Tetradecenal	yes	up	-	neg	169054-69-7	255.197	6.09337	C14H26O	HMDB0032526	-	Fatty aldehydes	1.6826	1.6841	2.2443	0.003279	0.005705	4.4753	4.3721	3.3598	1.8681	1.8538	1.7181
neg_4675	Avocadene 1-acetate	yes	up	-	neg	24607-09-8	373.26	6.1461	C19H36O4	HMDB0031043;LMFA05000640	-	Fatty alcohols	1.7626	1.7624	2.0415	9.77e-07	2.51e-05	4.6527	4.6786	4.5272	2.2769	2.2504	2.2629
neg_6512	Trans-p-Menth-2-ene-1,4-diol	yes	up	-	neg	21473-37-0	385.26	6.23378	C10H18O2	HMDB0037021	-	Monoterpenoids	2.1	2.0997	2.9251	1.43e-08	2.56e-06	5.0719	5.1191	5.0433	1.7498	1.7237	1.736
neg_6728	Tetradecanedioic acid	yes	down	C11002	neg	821-38-5	257.176	5.36587	C14H26O4	LMFA01170018;HMDB0000872	-	Fatty acids and conjugates	1.8118	1.8109	0.5443	0.0006858	0.001665	3.1248	3.1561	2.8208	5.0895	5.8822	5.7494
neg_7069	5-(4-hydroxy-3-methoxyphenyl)pentanoic acid	yes	up	-	neg	-	205.087	4.42055	C12H16O4	HMDB0127761	-	Methoxyphenols	1.9642	1.9642	3.5245	2.56e-05	0.0001952	4.2035	4.2599	3.8337	1.1754	1.1505	1.1622
neg_7099	PGK1	yes	up	-	neg	-	351.218	4.35117	C20H32O5	LMFA03010170	-	-	1.937	1.9368	2.4021	0.0002597	0.0008331	4.9629	4.9461	4.8942	2.5209	1.8697	1.7705
neg_7135	2'-Hydroxyenterolactone	yes	up	-	neg	-	313.109	4.26322	C18H18O5	HMDB0041645	-	Tetrahydrofuran lignans	1.7118	1.7107	2.0437	0.0007988	0.001868	4.3153	4.2805	4.7454	1.9696	1.9859	2.5739
neg_7837	LysoPE(24:6(6Z,9Z,12Z,15Z,18Z,21Z)/0:0)	yes	down	-	neg	-	552.305	3.0628	C29H48NO7P	HMDB0011529;LMGP02050073	-	Glycerophosphoethanolamines	1.9415	1.9412	0.4458	0.0001214	0.0005009	2.3477	1.9785	2.6275	5.2732	5.1014	5.225
neg_8066	(-)-Matairesinol 4'-[apiosyl-(1->2)-glucoside]	yes	down	-	neg	211115-82-1	633.225	2.79045	C31H40O15	HMDB0032830	-	-	1.8904	1.8901	0.4791	2.48e-06	4.36e-05	2.4737	2.4603	2.5451	5.0781	5.2514	5.2825
neg_8068	Piperitoside	yes	up	-	neg	20196-92-3	593.131	2.79045	C30H26O13	HMDB0037348	-	Flavonoid glycosides	1.7705	1.77	1.8165	9.19e-08	6.26e-06	5.2379	5.2951	5.3239	2.9241	2.8974	2.91
neg_8069	L-Urobilinogen	yes	up	C05789	neg	17095-63-5	631.331	2.79045	C33H48N4O6	HMDB0004157	Metabolism of cofactors and vitamins	Bilirubins	2.0273	2.0274	2.3141	8.2e-05	0.000394	5.6121	5.6499	5.3172	2.0691	2.5138	2.581
